# Supplementary material
Source: PubMed Central journal article supplement (PMC3657094)
Supplement: supp_112.050831_FigS1_20Mar13.pdf [file supp_112.050831_FigS1_20Mar13.pdf]

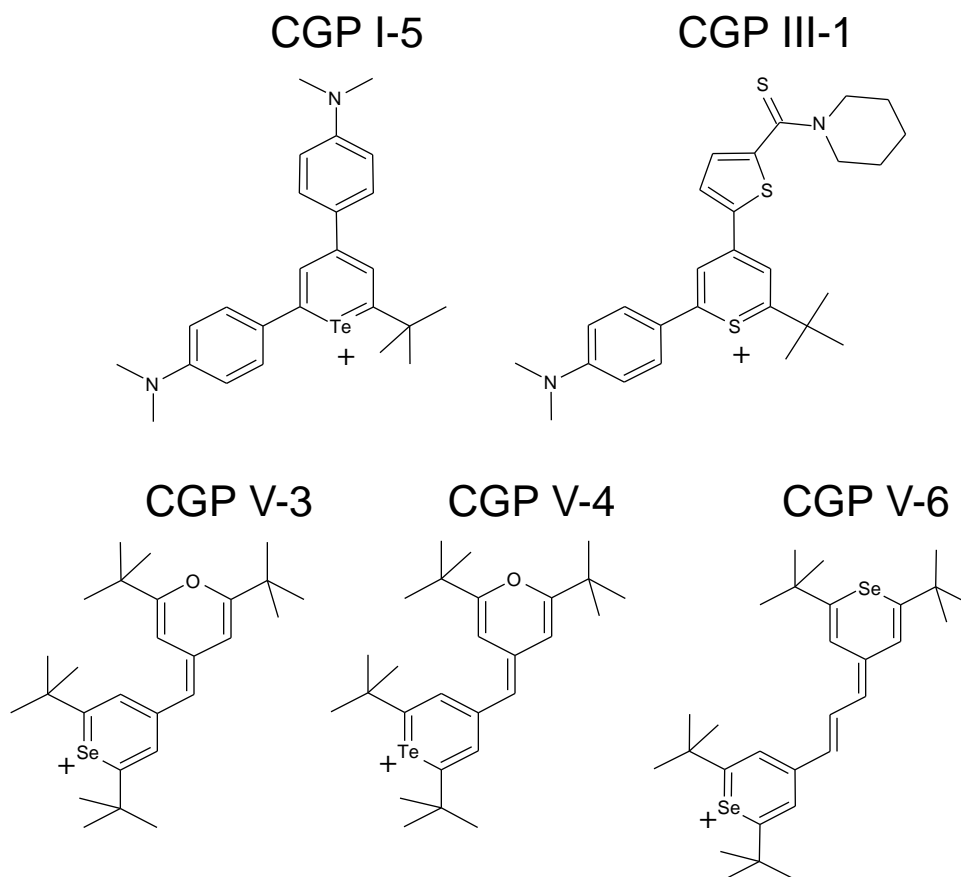

| CGP   | X  | log <i>P</i> | IC <sub>50</sub> (μM) <sup>a</sup> | % inhibition <sup>b</sup> |
|-------|----|--------------|------------------------------------|---------------------------|
| I-5   | Te | 1.55         | 2.5 ± 0.5                          | 23 ± 4                    |
| III-1 | S  | 2.10         | 1.6 ± 0.4                          | 52 ± 9                    |
| V-3   | Se | 1.85         | 1.1 ± 0.4                          | 66 ± 19                   |
| V-4   | Te | 1.91         | 1.2 ± 0.2                          | 46 ± 10                   |
| V-6   | Se | 1.92         | 0.9 ± 0.1                          | 59 ± 23                   |

<sup>a</sup> concentration at which ATP-dependent MRP1-mediated E<sub>2</sub>17βG uptake into inside-outside vesicles is inhibited by 50%

<sup>b</sup> % inhibition of calcein efflux from MRP1-overexpressing HEK cells

**FIG. S1.** Chemical structures of five CGPs shown to inhibit MRP1-mediated calcein efflux from intact HEK-MRP1 cells by ≥ 23%.
