# Supplementary material
Source: PubMed Central journal article supplement (PMC3657094)
Supplement: supp_112.050831_FigS2_20Mar13.pdf [file supp_112.050831_FigS2_20Mar13.pdf]

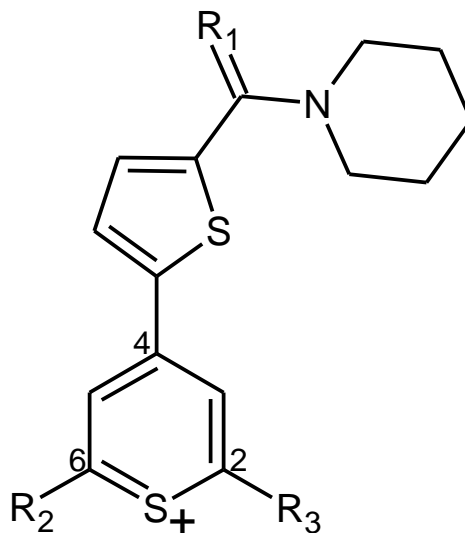

| CGP     | R <sub>1</sub> | R <sub>2</sub>     | R <sub>3</sub>     |
|---------|----------------|--------------------|--------------------|
| III-1   | S              | PhNMe <sub>2</sub> | tBu                |
| III-1-1 | S              | PhNMe <sub>2</sub> | PhNMe <sub>2</sub> |
| III-1-2 | S              | tBu                | tBu                |
| III-1-3 | O              | PhNMe <sub>2</sub> | PhNMe <sub>2</sub> |
| III-1-4 | O              | PhNMe <sub>2</sub> | tBu                |
| III-1-5 | O              | tBu                | tBu                |

**FIG. S2.** Chemical structures of analogs of CGP III-1.
