# Supplementary material
Source: PubMed Central journal article supplement (PMC3657094)

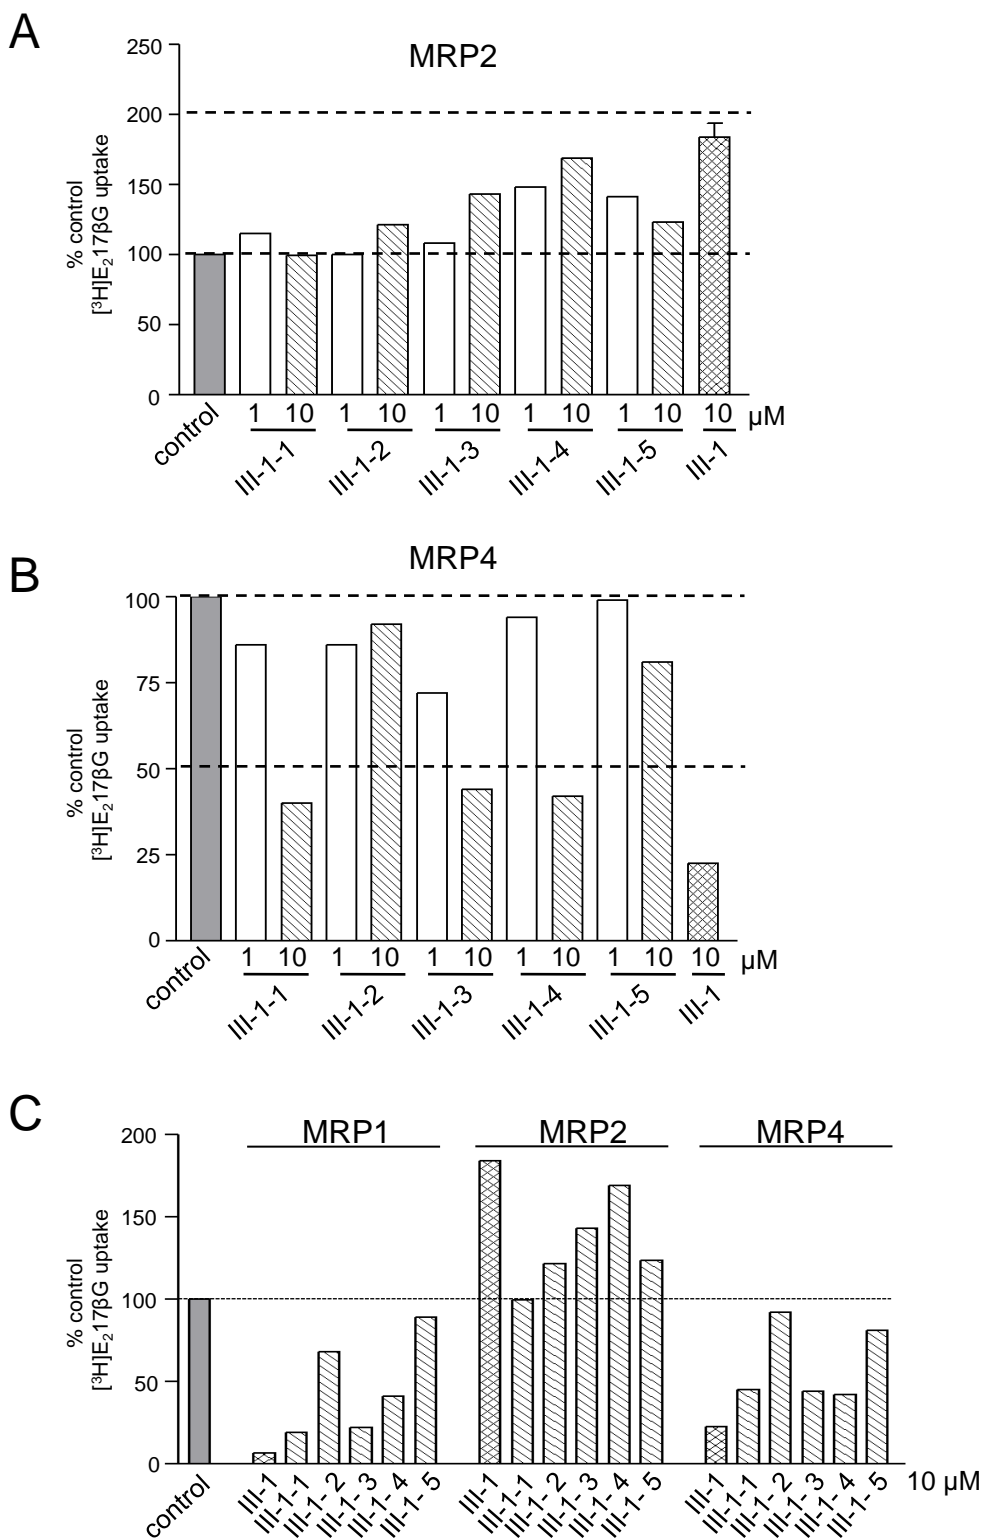

**FIG. S3.** Effect of CGP III-1 analogs on MRP1, MRP2 and MRP4 transport activities.

Supplement: supp_112.050831_FigS3_20Mar13.pdf [file supp_112.050831_FigS3_20Mar13.pdf]
